## 1 **Data Release**

2

3 Genomic features of *Mycobacterium avium* subsp. *hominissuis* isolated from pigs in Japan.

4

5 Tetsuya Komatsu<sup>1¶</sup>, Kenji Ohya<sup>2,3¶#</sup>, Atsushi Ota<sup>4</sup>, Yukiko Nishiuchi<sup>5</sup>, Hirokazu Yano<sup>6</sup>, Kayoko  
6 Matsuo<sup>7</sup>, Justice Opore Odoi<sup>3</sup>, Shota Sukanuma<sup>2##</sup>, Kotaro Sawai<sup>2,8</sup>, Akemi Hasebe<sup>9</sup>, Tetsuo  
7 Asai<sup>3</sup>, Tokuma Yanai<sup>2, 3, 10</sup>, Hideto Fukushi<sup>2, 3</sup>, Takayuki Wada<sup>11</sup>, Shiomi Yoshida<sup>12</sup>, Toshihiro  
8 Ito<sup>13</sup>, Kentaro Arikawa<sup>14</sup>, Mikihiro Kawai<sup>15</sup>, Manabu Ato<sup>16</sup>, Anthony D Baughn<sup>17</sup>, Tomotada  
9 Iwamoto<sup>14</sup>, Fumito Maruyama<sup>5, 18, 19\*</sup>

10

## 11 **Affiliations**

12 1. Aichi Prefectural Chuo Livestock Hygiene Service Center, Okazaki, Aichi, Japan

13 2. Faculty of Applied Biological Sciences, Gifu University, Gifu, Gifu, Japan

14 3. United Graduate School of Veterinary Sciences, Gifu University, Gifu, Gifu, Japan

15 4. Data Science Center, Division of Biological Science, Nara Institute of Science and  
16 Technology, Ikoma, Nara, Japan

17 5. Office of Academic Research and Industry-Government Collaboration, Hiroshima  
18 University, Higashi-Hiroshima, Hiroshima, Japan

19 6. Graduate School of Life Sciences, Tohoku University, Sendai, Miyagi, Japan

20 7. Kumamoto Prefectural Aso Public Health Center, Aso, Kumamoto, Japan

21 8. Viral Disease and Epidemiology Research Division, National Institute of Animal Health,  
22 National Agriculture Research Organization, Tsukuba, Ibaraki, Japan

23 9. Toyama Prefectural Meat Inspection Center, Imizu, Toyama, Japan

24 10. Hiwa Natural History Museum, Shobara, Hiroshima, Japan

25 11. Graduate School of Human Life Science, Osaka City University, Osaka, Osaka, Japan

26 12. Clinical Research Center, National Hospital Organization Kinki-Chuo Chest Medical Center,  
27 Sakai, Osaka, Japan

28 13. Laboratory of Proteome Research, Proteome Research Center, National Institutes of  
29 Biomedical Innovation, Health and Nutrition, Ibaraki, Osaka, Japan

30 14. Department of Infectious Diseases, Kobe Institute of Health, Kobe, Hyogo, Japan

31 15. Graduate School of Human and Environmental Studies, Kyoto University, Kyoto, Kyoto,  
32 Japan

33 16. Department of Mycobacteriology, Leprosy Research Center, National Institute of  
34 Infectious Diseases, Higashimurayama, Tokyo, Japan

35 17. Department of Microbiology and Immunology, University of Minnesota Medical School,  
36 Minneapolis, Minnesota, USA

37 18. Project Research Center for Holobiome and Built Environment (CHOBE), Hiroshima  
38 University, Higashi-Hiroshima, Hiroshima, Japan

39 19. Scientific and Technological Bioresource Nucleus, Universidad de La Frontera, Temuco,  
40 Chile

41

42 #Current Address: National Institute of Health Sciences, Kawasaki, Kanagawa, Japan

43 ##Current Address: Central Research Institute for Feed and Livestock of Zen-noh, Tsukuba,  
44 Ibaraki, Japan

45 ¶These authors contributed equally to this work.

46

47 corresponding author(s): Fumito Maruyama ([fumito@hiroshima-u.ac.jp](mailto:fumito@hiroshima-u.ac.jp))

48

49 E-mail addresses and ORCID IDs:

50 Tetsuya Komatsu: [gsbqm670@yahoo.co.jp](mailto:gsbqm670@yahoo.co.jp), 0000-0002-6207-5783

51 Kenji Ohya: [kenji.ohya@kkd.biglobe.ne.jp](mailto:kenji.ohya@kkd.biglobe.ne.jp), 0000-0002-8867-3618

- 52 Atsushi Ota: [level997@gmail.com](mailto:level997@gmail.com)
- 53 Yukiko Nishiuchi: [nishiuchi@hiroshima-u.ac.jp](mailto:nishiuchi@hiroshima-u.ac.jp), 0000-0002-2973-9285
- 54 Hirokazu Yano: [yano.hirokazu@ige.tohoku.ac.jp](mailto:yano.hirokazu@ige.tohoku.ac.jp), 0000-0001-5144-3459
- 55 Kayoko Matsuo: [alaeuris@violin.ocn.ne.jp](mailto:alaeuris@violin.ocn.ne.jp)
- 56 Justice Opare Odoi: [wentworthprince@yahoo.com](mailto:wentworthprince@yahoo.com), 0000-0002-4109-1215
- 57 Shota Suganuma: [suganuma-shouta@zennoh.or.jp](mailto:suganuma-shouta@zennoh.or.jp)
- 58 Kotaro Sawai: [sawaik107@affrc.go.jp](mailto:sawaik107@affrc.go.jp), 0000-0003-1085-5144
- 59 Akemi Hasebe: [akemi.hasebe@pref.toyama.lg.jp](mailto:akemi.hasebe@pref.toyama.lg.jp)
- 60 Tetsuo Asai: [tasai@gifu-u.ac.jp](mailto:tasai@gifu-u.ac.jp), 0000-0002-6556-9674
- 61 Tokuma Yanai: [tokumayanai@gmail.com](mailto:tokumayanai@gmail.com), 0000-0002-1118-5771
- 62 Hideto Fukushi: [hfukushi@gifu-u.ac.jp](mailto:hfukushi@gifu-u.ac.jp)
- 63 Takayuki Wada: [twada@osaka-cu.ac.jp](mailto:twada@osaka-cu.ac.jp), 0000-0002-7023-7455
- 64 Shiomi Yoshida: [yoshida.shiomi.vg@mail.hosp.go.jp](mailto:yoshida.shiomi.vg@mail.hosp.go.jp), 0000-0002-8197-3829
- 65 Toshihiro Ito: [toshihiroito@nibiohn.go.jp](mailto:toshihiroito@nibiohn.go.jp)
- 66 Kentaro Arikawa: [kentaro\\_arikawa@office.city.kobe.lg.jp](mailto:kentaro_arikawa@office.city.kobe.lg.jp)
- 67 Mikihiko Kawai: [kawai.mikihiko.8c@kyoto-u.ac.jp](mailto:kawai.mikihiko.8c@kyoto-u.ac.jp), 0000-0001-7219-3823
- 68 Manabu Ato: [ato@niid.go.jp](mailto:ato@niid.go.jp), 0000-0002-3178-2645
- 69 Anthony D Baughn: [abaughn@umn.edu](mailto:abaughn@umn.edu), 0000-0003-1188-4238
- 70 Tomotada Iwamoto: [kx2t-iwmt@asahi-net.or.jp](mailto:kx2t-iwmt@asahi-net.or.jp), 0000-0002-2650-0308
- 71 Fumito Maruyama: [fumito@hiroshima-u.ac.jp](mailto:fumito@hiroshima-u.ac.jp), 0000-0003-2347-616X

72

## 73 **Abstract**

74 *Mycobacterium avium* subsp. *hominissuis* (MAH) is one of the most important agents causing  
75 non-tuberculosis mycobacterial infection in humans and pigs. Genome analysis on MAH of  
76 human isolates has been proceeding, however, those of pigs are limited despite its potential  
77 source of infection to human. In the current study, we obtained 30 draft genome sequences

78 of MAH of pigs reared in Japan. The 30 draft genomes consisted of 4,848,678 – 5,620,788 bp  
79 length, 4,652 – 5,388 coding genes and 46 – 75 (Med: 47) tRNAs. All isolates had restriction  
80 modification associated genes and 185 – 222 predicted virulence genes. Two isolates had  
81 tRNA arrays and one isolate had a clustered regularly interspaced short palindromic repeat  
82 (CRISPR) region. Our results will be useful for evaluation of the ecology of MAH by providing  
83 a foundation for genome-based epidemiological studies.

84

85 Research Areas: Microbiology

86 Classification: Molecular Genetics, Microbial Ecology

87

88

## 89 **Data description**

### 90 **Context**

91 To date, incidence of infection caused by non-tuberculous mycobacteria (NTM) has been  
92 increasing all over the world [1]. Among NTMs, *Mycobacterium avium* complex (MAC) is one  
93 of the most critical agents. MAC has 4 subspecies, namely *M. avium* subsp. *avium* (MAA), *M.*  
94 *avium* subsp. *paratuberculosis* (MAP), *M. avium* subsp. *silvaticum* (MAS) and *M. avium* subsp.  
95 *hominissuis* (MAH). MAH is known as a major pathogen for humans, causing lung disease and  
96 sometimes disseminated infection in immune suppressed patients [2, 3]. MAH is also a main  
97 causative agent of mycobacteriosis in pigs [4], showing mesenteric and mandibular  
98 lymphadenitis [5] and sometimes systemic infection [6]. Swine mycobacteriosis exerts severe  
99 economic impact in affected farms. MAH infected pigs are suspected as potential risk for  
100 human infection [7, 8, 9, 10].

101 Recently, genomic epidemiological study of MAH has extensively progressed. In our recent  
102 studies, MAH is divided into 6 major lineages (MahEastAsia1, MahEastAsia2, SC1 - SC4) and  
103 each lineage is predominant in specific regions on a global scale [11, 12]. For example, the

104 MahEastAsia1 and MahEastAsia2 are frequently isolated from human lung disease in Japan  
105 and Korea although SC1 – 4 are isolated from America and Europe [11, 12]. Japanese pig  
106 isolates are mainly classified into 2 lineages, SC2 and SC4 [11, 12]. However, from the one  
107 health point of view, to exactly clarify the ecology of MAH, the number of pig isolates used in  
108 these studies was insufficient.

109 As stated above, genome-based analysis of MAH has been proceeding and the most  
110 essential genes of MAH are thought to be mutual orthologues of genes in *Mycobacterium*  
111 *tuberculosis* (MTB) [13]. Although components of virulence systems have been investigated  
112 [14], reports about genome contents, even drug resistance genes are not available, despite  
113 the increasing the incidence of MAH disease [1]. To understand MAH evolution, distribution  
114 and to promote the identification of targets for antimicrobial drug discovery, the  
115 characterization of the defining genomic features of MAH is essential.

116 Here we obtained draft genome sequences of 30 MAH isolates derived from pigs reared in  
117 Japan, and identified genome features for bacterial defense systems, such as restriction  
118 modification (RM) system, clustered regularly interspaced short palindromic repeat (CRISPR),  
119 tRNA arrays, virulence factors and drug resistance genes. Our results in this study may  
120 provide a way to understand the epidemiological relationship of MAH in human and pigs.

121

## 122 **Methods**

### 123 a) Sampling

124 MAH isolates were collected from pigs reared at two areas, Tokai and Hokuriku in Japan,  
125 where about 10 % of pigs in Japan are reared. 48 mesenteric or mandibular lymph nodes of  
126 pigs reared in Tokai area were collected from Gifu meat inspection center from July –  
127 December, 2015. Samples (20: mesenteric lymph nodes, 1: mandibular lymph nodes, 1: liver)  
128 of Tokai and Hokuriku area were collected between August, 1998 – Mar, 2018 and archived  
129 in Toyama meat inspection center.

130

131 b) Bacterial isolation and DNA extraction

132 The method of bacterial isolation was available in protocols. io [15]. The mesenteric or  
133 mandibular lymph nodes with mycobacterial granulomatous lesions were mixed with 400ul  
134 of 2% NaOH and incubated at room temperature overnight. The samples were spread onto  
135 2% Ogawa medium (Kyokuto Pharmaceutical, Tokyo, Japan) and incubated at 37 °C for 3 – 4  
136 weeks. A single colony was inoculated onto 7H11 broth with 10% oleic acid-albumin-  
137 dextrose-catalase as a supplement. The isolates were stored with Microbank (Pro Lab  
138 Diagnostics Inc., Richmond Hill, ON, Canada) at -80°C. The method of extraction of genomic  
139 DNA was also available in protocols. io [16]. In brief, cells were delipidated by treatment with  
140 chloroform and methanol, then lysed by lysozyme and Proteinase K. Genomic DNA was  
141 extracted by phenol/chloroform treatment of the lysates.

142

143 c) Identification of MAH and insertion sequence profile

144 PCR amplification of *M. avium* 16S rRNA genes (MAV) was conducted for screening [17].  
145 Isolates positive for MAV were identified by sequencing *hsp65* and *rpoB* genes [18, 19]. Basic  
146 Local Alignment Search Tool (BLAST) analysis was conducted using partial sequences of *rpoB*  
147 gene. Phylogenetic analysis of both genes was conducted by maximum likelihood method  
148 using Molecular Evolutionary Genetics Analysis (MEGA) software ver. 7.0. Bootstrap values  
149 were calculated from 1,000 replications. Insertion sequence patterns of IS900, IS901, IS902  
150 and IS1245 were performed as described previously [20, 21, 22]. IS1311 and IS1613 were  
151 searched for within draft genomes by using ISfinder (<https://isfinder.biotoul.fr>) with default  
152 parameters [23].

153

154 d) Draft genome sequences and genome annotation

155 Extraction of genomic DNA was described above. An average 350-bp paired-end libraries  
156 were prepared from extracted genomic DNA by TruSeq DNA PCR-Free High Throughput  
157 Library Prep Kit (Illumina, San Diego, CA, USA). Pair-end sequencing (2× 150-bp) was  
158 conducted using the HiSeq X Ten sequencing platform (Illumina) at the Beijing Genomics  
159 Institute (Shenzhen, China). Output reads were trimmed by TrimGalore!  
160 (<https://github.com/FelixKrueger/TrimGalore>) and were corrected its mismatched reads by  
161 SPAdes ver 3.12.0. [24]. The reads were assembled and polished using Pilon [25] and  
162 Unicycler [26], and then genome completeness was estimated by CheckM [27]. Taxonomic  
163 classification of contigs was carried out using Kaiju [28] and Anvi'o [29]. Draft genome  
164 sequences were annotated via the National Center for Biotechnology Information (NCBI)  
165 Prokaryotic Genome Annotation Pipeline (PGAP) [30]. To confirm isolates as MAH, *in silico*  
166 DNA-DNA hybridization was conducted with *M. avium* reference strains, MAH (TH135:  
167 AP012555, 104: CP000479 and 109: CP029332), MAA (DSM44156: CP046507), MAS  
168 (ATCC49884: AYOC00000000) and MAP (K-10: AE016958) via the MUMmer program with  
169 JspiecesWS [31].

170

171 e) Detection of bacterial defence systems (RM system and CRISPR CAS system) in MAH  
172 genome

173 RM systems were determined by online tool, Restriction-ModificationFinder version 1.1  
174 (<https://cge.cbs.dtu.dk/services/Restriction-ModificationFinder/>) twice with the following  
175 settings (1: database: All incl. putative genes, threshold for %ID: 90%, minimum length: 80%  
176 to search the RM system of MAH and 2: database: All, threshold for %ID: 10%, minimum

177 length: 20% to confirm the orthologue of MTB or the other Mycobacteria) [32]. CRISPR Cas  
178 systems were identified by the online tool CRISPRCasFinder program  
179 (<https://crisprcas.i2bc.paris-saclay.fr/CrisprCasFinder/Index>) with default setting [33, 34].

180

181 f) Detection of tRNA arrays in MAH genome

182 Total number of tRNAs in this study were retrieved from gb files annotated by PGAP. Draft  
183 genomes of GM17 and OCU479 isolates, which had more tRNAs than the others (Table 1),  
184 were inspected by tRNAscan-SE (<http://lowelab.ucsc.edu/tRNAscan-SE/>) to search tRNA  
185 arrays [35]. tRNA gene isotype synteny (expressed by the single-letter amino acid code) of  
186 both isolates and the reference strains were aligned and used for the maximum likelihood  
187 method by MEGA 7.0. Classification of both isolates was conducted as previously described  
188 [36].

189

190 g) Detection of virulence factors and drug resistance genes

191 Virulence genes were identified by using VFAnalyzer (<http://www.mgc.ac.cn/VFs/main.htm>)  
192 [37]. We selected the following settings, genus: Mycobacterium, specify a representative  
193 genome: *M. avium* 104 and choose genomes for comparison: blank and draft genome fasta  
194 files were uploaded. Drug resistance genes were identified by Resistance Gene Identifier  
195 version 5.1.0 (<https://card.mcmaster.ca/analyze/rgi>) with the following settings, Select Data  
196 Type: DNA sequence, Select Criteria: Perfect and Strict hit only, Nudge  $\geq 95\%$  identity Loose  
197 hits to Strict: Exclude nudge, Sequence Quality: high quality/coverage [38].

198

199 **Data Validation and quality control**



## 200 Identification of MAH

201 The experimental workflow from sampling to identification is shown in Fig. 1. We  
202 successfully obtained 13 MAH isolates derived from Tokai area and 8 out of 13 isolates (GM5  
203 – GM44) with 22 isolates of Tokai and Hokuriku area (OCU467 – OCU486, Toy194, Toy195)  
204 were used for draft genome sequence analysis. We conducted multiple examinations to  
205 determine the isolates as MAH, IS possession patterns, sequence analysis of *hsp65*  
206 (Supplementary Table 1). Among MAH subspecies, the patterns of IS possession is different  
207 and is used for subspecies identification [39]. *IS900* and *IS901* are known as the indicator of  
208 MAP and MAA, respectively [21, 22]. MAH is usually positive for *IS1245* [40], and is negative  
209 for *IS900*, *IS901* and *IS902* [20], however, MAH strains without *IS1245* are frequently  
210 distributed in Japan [41, 39]. In our study, 10/30 isolates were negative for *IS1245* (33.3%)  
211 and none had *IS900*, *IS901* and *IS902* (Supplementary Table 1). In general, subspecies of *M.*  
212 *avium* is also identified by *hsp65* gene analysis, which had 17 variations of SNP among  
213 subspecies [19]. MAH has usually 1, 2, 3, 7, 8 or 9 *hsp* code [19], however, five isolates had  
214 unclassified *hsp* code (indicated by N) in this study (Supplementary Table 1). Therefore, we  
215 added to conducted partial sequence analysis of *rpoB* gene and the isolates were identified  
216 as MAH by BLAST analysis. In addition, we conducted phylogenetic analysis based on *hsp65*  
217 and *rpoB* genes retrieved from draft genome and all isolates in this study were also classified  
218 into MAH (Fig 2). Finally, we compared the genome identity of our isolates with those of  
219 MAA, MAS and MAP reference strains via MUMmer program, resulting that all isolates had  
220 highest identity with MAH strains (Supplementary Table 2). All of these examinations  
221 confirmed that our isolates were MAH.

222

## 223 Draft genome data

224 All of our draft genome sequences had a total length between 4.85 – 5.46 Mb, similar to  
225 complete MAH genomes [42, 43]. All isolates had over 24kb N50 and over 40 fold genome  
226 coverage (average 233) (Table 1).

227

228 Genome content analysis

229 In total, we identified 73 putative RM systems, including 24 type I RM systems, 48 type II RM  
230 systems, and 1 type III RM systems (Supplementary Table 3). All isolates had at least one  
231 Type II RM system and GM5, GM16, GM17, OCU468 – OCU470, OCU472, OCU473, OCU475,  
232 OCU476, OCU479, OCU483 and OCU484 had Type I, Type II RM systems, and GM44 had 3  
233 types of RM system. In these RM systems, 7 RM systems had homologues in MTB and 30 RM  
234 systems had homologues in *M. kansasii*. Orphan methyltransferase was detected in OCU473  
235 and OCU479. CRISPR was detected only in GM44 (Supplementary Table 4). The sequences of  
236 the region were identical to MAH 104 (Query Cover: 100%, E value: 0.0, Per. Ident: 99.99%)  
237 which is the only MAH strain that had an intact CRISPR in the database  
238 (<https://crisprcas.i2bc.paris-saclay.fr/MainDb/StrainList>). The isolates had 185 – 222  
239 virulence factors and 141 factors were common in all isolates (Supplementary Table 5). All  
240 isolates shared the same 2 drug resistance genes, *mtrA* which is associated with cell division  
241 and cell wall integrity [44] and resistant to macrolide antibiotics, and *RbpA* which regulates  
242 bacterial transcription and is associated with rifampicin resistance (Supplementary Table 6)  
243 [45]. In addition, single nucleotide polymorphisms (SNP) associated with drug resistance  
244 were found. All isolates had a C117D change in the *murA* gene conferring resistance to  
245 fosfomycin and a A2274G mutation in the *Mycobacterium avium* 23S rRNA which contributes  
246 to macrolide resistance (Supplementary Table 6). CRISPR, virulence factor and drug  
247 resistance genes were selected from online tools. Original databases of each tool used in this  
248 study were updated in 2020, suggesting our data are based on the forefront of existing  
249 Knowledge.

250

251 tRNA arrays

252 tRNA arrays were detected in isolates GM17 and OCU479 (Supplementary Table 7). tRNA  
253 array was discovered in some MAH isolates in the past study, and phylogenetic analysis  
254 based on nucleotide sequences of tRNA array showed that tRNA array of MAH was classified  
255 into a specific group [36]. To confirm tRNA arrays in this study as authentic tRNA array,  
256 phylogenetic analysis was performed. Our tRNA arrays were classified into the group 3,  
257 defined in the previous study (Fig. 3) [36].

258

### 259 **Re-use potential**

260 MAH is known as one of the most critical *M. avium* subspecies causing non-tuberculosis  
261 mycobacterial infection in human and pigs. Pigs are suspected to be the most dominant host  
262 of MAH in animal and a potential source of infection for human [7, 8, 9, 10]. However, the  
263 study about relationship with human and pig MAH isolates based on genome is limited [11,  
264 12]. Our study provides 30 draft genome sequences of MAH isolated from pigs. We believe  
265 that these data will be useful for genome-based epidemiological studies to evaluate the  
266 importance of pigs as a source of infection. In addition, we provide molecular identification  
267 of defense systems, tRNA arrays, virulence factors and drug resistance genes. These data are  
268 expected to be used in future research of MAH classification, pathogenicity, and  
269 identification of antimicrobial drug targets. Principally, our draft genomes were derived from  
270 both cases of systemic and lymph node limited infection of MAH. Thus, the provided  
271 virulence factors can be included in the important candidate genes associated with systemic  
272 infection of pigs.

273

### 274 **Data Availability**

275 The summary information of draft genomes of the 30 MAH isolates are shown in Table 1. The  
276 genome sizes ranged to from approximately 4.8Mbps to 5.6Mbps. GC content was from  
277 68.77% to 69.26%. All genome sequences have been deposited in GenBank under accession  
278 numbers VRUQ000000000, WEGO000000000 to WEGZ000000000 and WEHA000000000 to  
279 WEHQ000000000, and SRA under accession numbers SRR13521605, SRR13556487 to  
280 SRR13556515.

281

## 282 **Declarations**

### 283 **List of abbreviations**

284 NTM: non-tuberculous mycobacteria; MAC: *Mycobacterium avium* complex; MAA: *M. avium*  
285 subsp. *avium*; MAP: *M. avium* subsp. *paratuberculosis*; MAS: *M. avium* subsp. *silvaticum*;  
286 MAH: *Mycobacterium avium* subsp. *hominissuis*; MTB: *Mycobacterium tuberculosis*; RM:  
287 restriction modification; CRISPR: clustered regularly interspaced short palindromic repeat;  
288 BLAST: Basic Local Alignment Search Tool; MEGA: Molecular Evolutionary Genetics Analysis;  
289 NCBI: National Center for Biotechnology Information; PGAP: Prokaryotic Genome Annotation  
290 Pipeline; SNP: single nucleotide polymorphism

291

### 292 **Consent for publication**

293 Not applicable.

294

### 295 **Competing interests**

296 The authors declare no competing interests.

297

### 298 **Funding**

299 This research was supported by a grant from the Japan Agency for Medical Research and  
300 Development (AMED)(17fk0108116h040 and 21fk0108129h0502), the Japan Racing

301 Association (JRA) Livestock Industry Promotion Project (H28-29\_239, H29-30\_7) of the JRA, a  
302 grant for Meat and Meat Products (H28-130, H30-60] managed by the Ito Foundation for  
303 research in design study, collection, analysis; and was supported by grants from the Japan  
304 Society for the Promotion of Science (JSPS) KAKENHI (JP26304039, JP18K19674, 16H05501,  
305 16H01782). JOO is a recipient of a Japanese Ministry of Education, Culture, Sports, Science  
306 and Technology (MEXT) scholarship.

307

### 308 **Author's contributions**

309 T.K, K.O and H.Y wrote the manuscript. K.M, A.H, S.S and K.S collected samples. K.O, J.O.O,  
310 S.S and K.S performed laboratory works. T.K, K.O, A.O, H.Y, J.O.O, I.Toshihiro and M.K  
311 conducted computational analysis. Y.N, T.A, T.Y, H.F, T.W, S.Y, K.A designed methods. M.A,  
312 A.D.B, K.O, N.Y, T.Iwamoto and F.M designed whole research and advised on the  
313 interpretation of the study's findings. All authors reviewed the manuscript.

314

### 315 **Acknowledgements**

316 We thank the member of Gifu central hygiene service center and Toyama meat inspection  
317 center for sampling. Computational resources were partly provided by the Data Integration  
318 and Analysis Facility, National Institute for Basic Biology, Japan.

319

### 320 **Figure Legends**

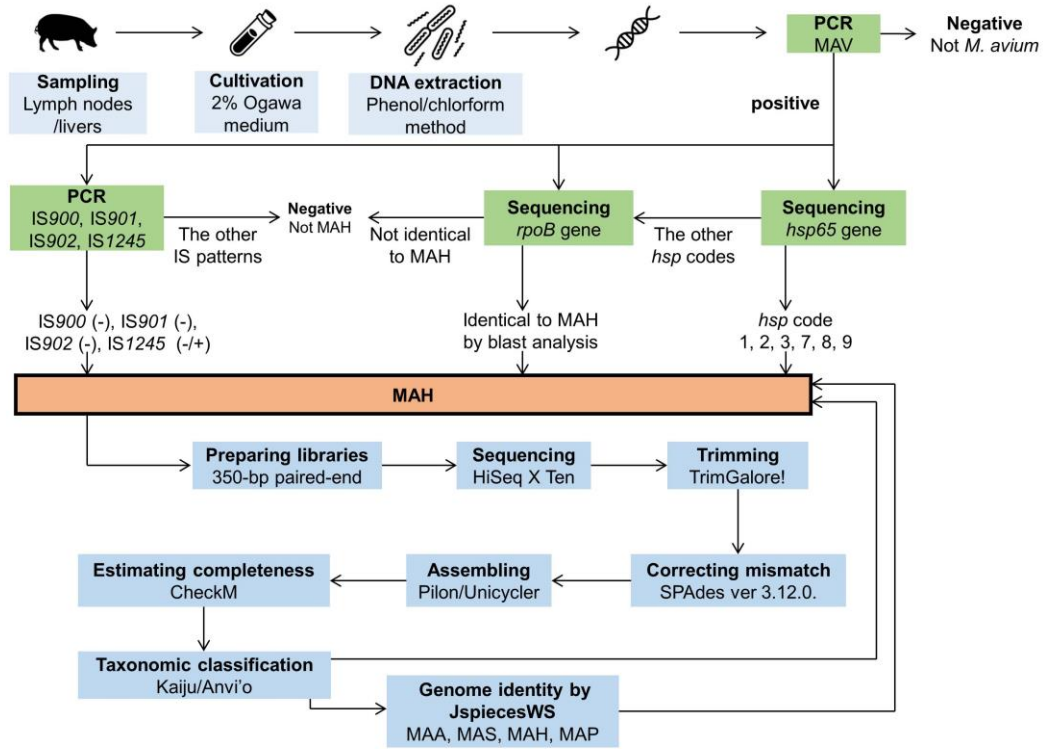

321

322 **Figure 1. The experimental workflows in this study.**

323

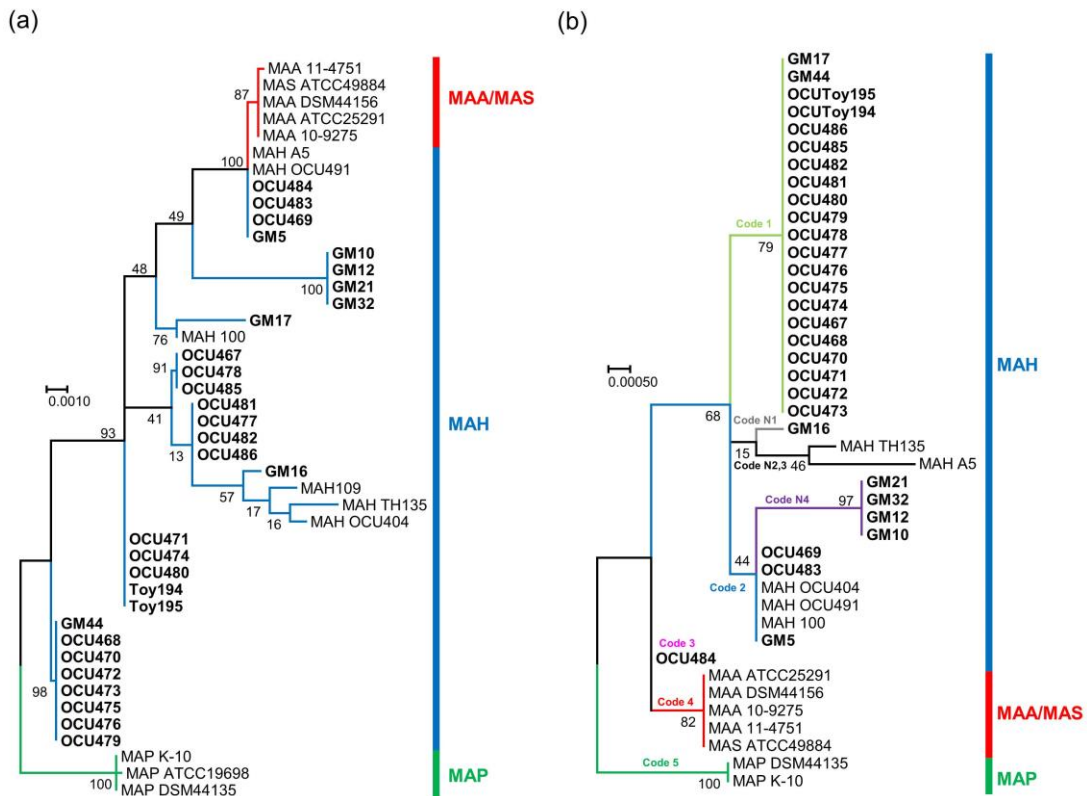

324

325 **Figure 2. Phylogenetic analysis based on *rpoB* gene and *hsp65* gene.** Phylogenetic tree was  
326 generated by maximum likelihood method using MEGA 7.0. All isolates in this study are  
327 indicated in bold font. **(a)** 30 MAH isolates in this study were classified as MAH and were  
328 differentiated from MAP and MAA/MAS node. **(b)** All the isolates in this study were classified  
329 into 5 *hsp* code, code 1, 2, 3, N1 and N4. These isolates were differentiated from MAP and  
330 MAA/MAS nodes. The bootstrap values were determined from 1,000 replications. The scale  
331 bar indicates genetic distances among strains.  
332

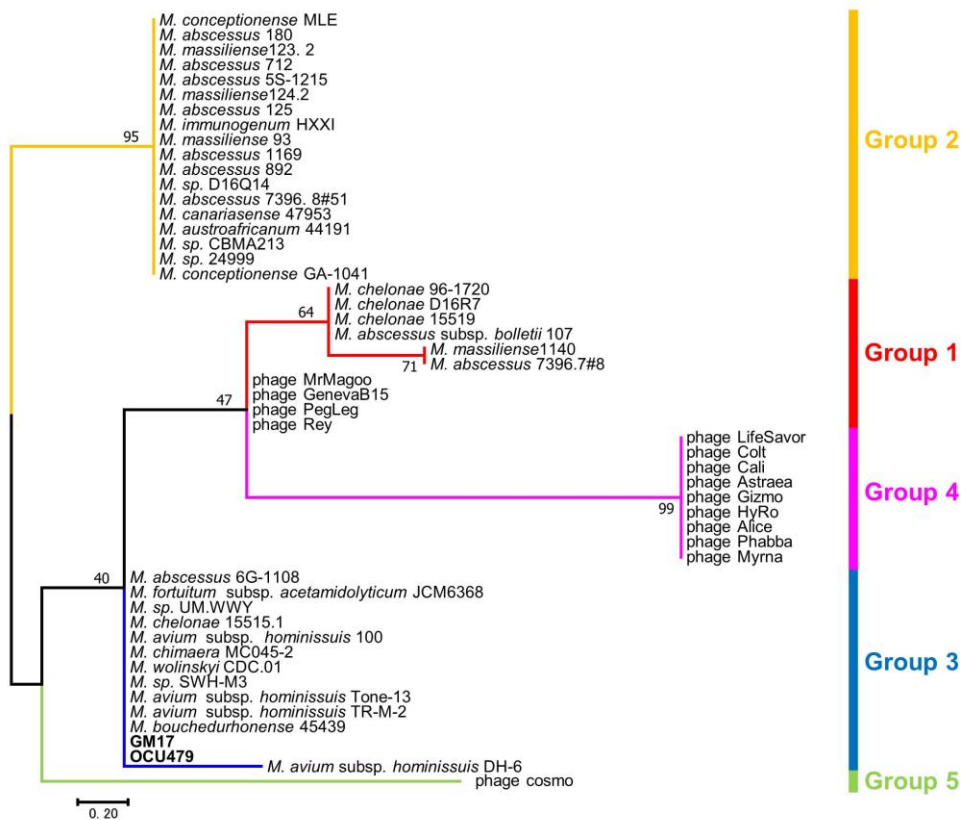

333  
334 **Figure 3. Phylogenetic tree based on the sequence of tRNA isotype located in tRNA array.**  
335 Phylogenetic tree was generated by maximum likelihood method using MEGA 7.0. Two  
336 isolates (GM17 and OCU479 indicated in bold) were classified in Group 3. The bootstrap  
337 values were determined from 1,000 replications. The scale bar indicates genetic distances  
338 among strains.  
339

340 **Tables**

341 **Table 1. Summary information for the draft genome sequences of 30 MAH isolates in this**  
 342 **study.** \* CDSs: coding sequences.

| Isolate | Genome size<br>(bp) | N50<br>(bp) | Coverage | No. of<br>contig | G+C<br>content (%) | No. of<br>CDSs* | No. of<br>tRNAs |
|---------|---------------------|-------------|----------|------------------|--------------------|-----------------|-----------------|
| GM5     | 5,037,010           | 35,760      | 277      | 224              | 69.06              | 4,877           | 47              |
| GM10    | 4,858,055           | 33,212      | 277      | 248              | 69.16              | 4,708           | 47              |
| GM12    | 4,848,678           | 33,219      | 253      | 261              | 69.17              | 4,732           | 47              |
| GM16    | 5,012,047           | 24,262      | 274      | 346              | 68.84              | 4,981           | 46              |
| GM17    | 5,265,075           | 30,906      | 355      | 289              | 68.77              | 5,190           | 75              |
| GM21    | 4,899,737           | 45,080      | 411      | 216              | 69.20              | 4,734           | 47              |
| GM32    | 4,897,271           | 47,147      | 292      | 208              | 69.20              | 4,712           | 47              |
| GM44    | 5,086,547           | 26,307      | 251      | 316              | 68.95              | 4,780           | 46              |
| OCU467  | 5,110,693           | 243,182     | 207      | 75               | 69.16              | 4,803           | 46              |
| OCU468  | 5,459,638           | 137,464     | 198      | 132              | 68.96              | 5,176           | 46              |
| OCU469  | 5,167,480           | 190,329     | 191      | 57               | 69.19              | 4,886           | 47              |
| OCU470  | 5,388,572           | 124,661     | 220      | 132              | 68.98              | 5,103           | 46              |
| OCU471  | 4,990,913           | 193,095     | 237      | 70               | 69.24              | 4,713           | 47              |
| OCU472  | 5,410,552           | 119,264     | 180      | 139              | 68.97              | 5,163           | 47              |
| OCU473  | 5,237,229           | 105,027     | 232      | 118              | 69.11              | 4,981           | 47              |
| OCU474  | 5,087,878           | 168,670     | 213      | 81               | 69.26              | 4,817           | 47              |
| OCU475  | 5,376,580           | 113,114     | 243      | 130              | 68.99              | 5,121           | 46              |
| OCU476  | 5,359,545           | 133,302     | 268      | 132              | 69.00              | 5,094           | 46              |
| OCU477  | 5,087,664           | 218,065     | 221      | 85               | 69.22              | 4,779           | 47              |
| OCU478  | 5,108,303           | 272,265     | 230      | 73               | 69.17              | 4,803           | 46              |



|        |           |         |     |     |       |       |    |
|--------|-----------|---------|-----|-----|-------|-------|----|
| OCU479 | 5,620,788 | 112,152 | 167 | 143 | 68.78 | 5,388 | 75 |
| OCU480 | 5,088,946 | 195,446 | 53  | 73  | 69.24 | 4,820 | 47 |
| OCU481 | 5,100,722 | 163,519 | 247 | 101 | 69.19 | 4,802 | 47 |
| OCU482 | 5,100,769 | 163,705 | 244 | 99  | 69.19 | 4,800 | 47 |
| OCU483 | 4,943,024 | 200,611 | 228 | 68  | 69.24 | 4,652 | 47 |
| OCU484 | 5,096,430 | 141,792 | 249 | 104 | 69.20 | 4,811 | 47 |
| OCU485 | 5,109,020 | 243,182 | 258 | 80  | 69.16 | 4,805 | 46 |
| OCU486 | 5,023,805 | 234,302 | 40  | 52  | 69.23 | 4,722 | 47 |
| Toy194 | 5,347,524 | 216,164 | 273 | 93  | 68.97 | 5,018 | 47 |
| Toy195 | 5,346,468 | 168,809 | 192 | 103 | 68.97 | 5,029 | 47 |

343

344

345 **Supplementary Table 1. Isolates information and molecular characteristics of 30 MAH in**  
346 **this study.** a: Detected IS was 1213bp and shared 83% identity with IS900.

347

348 **Supplementary Table 2. Comparison of genome identity among MAH isolates in this study**  
349 **and representative reference genome of *M. avium*.**

350

351 **Supplementary Table 3. Restriction modification system detected in 30 MAH isolates in**  
352 **this study.** \*<sup>1</sup>: These genes include the function of restriction enzyme/methyltransferase. \*<sup>2</sup>:

353 These genes could be orphan methyltransferase. Yellow background: putative genes.

354

355 **Supplementary Table 4. Detected CRISPR-Cas systems in MAH GM44.**

356

357 **Supplementary Table 5. Virulence factors detected in 30 MAH isolates in this study.**

358

359 **Supplementary Table 6. Drug resistance genes detected in 30 MAH isolates in this study.**

360

361 **Supplementary Table 7. The information about tRNA array detected in MAH isolates GM17**

362 **and OCU479.**

363

## 364 **References**

- 365 1. Daley CL. *Mycobacterium avium* complex disease. *Microbiol Spectr.* 2017;5.
- 366 2. Uchiya K, Takahashi H, Nakagawa T, Yagi T, Moriyama M, Inagaki T, et al.  
367 Characterization of a novel plasmid, pMAH135, from *Mycobacterium avium* subsp.  
368 *hominissuis*. *PLoS One.* 2015;10:e0117797.
- 369 3. Uchiya KI, Asahi S, Futamura K, Hamaura H, Nakagawa T, Nikai T, et al. Antibiotic  
370 susceptibility and genotyping of *Mycobacterium avium* strains that cause pulmonary  
371 and disseminated infection. *Antimicrob. Agents Chemother.* 2018;62:e02035-17.
- 372 4. Agdestein A, Johansen TB, Polaček V, Lium B, Holstad G, Vidanović D, et al.  
373 Investigation of an outbreak of mycobacteriosis in pigs. *BMC Vet Res.* 2011;7;:63.
- 374 5. Agdestein A, Johansen TB, Kolbjørnsen Ø, Jørgensen A, Djønne B, Olsen I, et al. A  
375 comparative study of *Mycobacterium avium* subsp. *avium* and *Mycobacterium avium*  
376 subsp. *hominissuis* in experimentally infected pigs. *BMC Vet Res.* 2012;8:11.
- 377 6. Hibiya K, Kasumi Y, Sugawara I Fujita J. Histopathological classification of systemic  
378 *Mycobacterium avium* complex infections in slaughtered domestic pigs. *Comp*  
379 *Immunol Microbiol Infect Dis.* 2008;31:347-66 .
- 380 7. Agdestein A, Olsen I, Jørgensen A, Djønne B, Johansen TB. Novel insights into  
381 transmission routes of *Mycobacterium avium* in pigs and possible implications for  
382 human health. *Vet Res.* 2014;45:46.
- 383 8. Johansen TB, Olsen I, Jensen MR, Dahle UR, Holstad G, Djønne B. New probes used  
384 for IS1245 and IS1311 restriction fragment length polymorphism of *Mycobacterium*

- 385            *avium* subsp. *avium* and *Mycobacterium avium* subsp. *hominissuis* isolates of human  
386            and animal origin in Norway. BMC Microbiol. 2007;7:14..
- 387            9. Klanicova B, Slana I, Vondruskova H, Kaevska M, Pavlik I. Real-time quantitative PCR  
388            detection of *Mycobacterium avium* subspecies in meat products. J Food Prot.  
389            2011;74:636-40.
- 390            10. Slana I, Kaevska M, Kralik P, Horvathova A, Pavlik I. Distribution of *Mycobacterium*  
391            *avium* subsp. *avium* and *M. a. hominissuis* in artificially infected pigs studied by  
392            culture and IS901 and IS1245 quantitative real time PCR. Vet Microbiol.  
393            2010;144:437-43.
- 394            11. Yano H, Iwamoto T, Nishiuchi Y, Nakajima C, Starkova DA, Mokrousov I, et al.  
395            Population structure and local adaptation of MAC lung disease agent *Mycobacterium*  
396            *avium* subsp. *hominissuis*. Genome Biol Evol. 2017;9:2403-17.
- 397            12. Yano H, Suzuki H, Maruyama F, Iwamoto T. The recombination-cold region as an  
398            epidemiological marker of recombinogenic opportunistic pathogen *Mycobacterium*  
399            *avium*. BMC Genomics. 2019;20:752.
- 400            13. Dragset MS, Iøerger TR, Loevenich M, Haug M, Sivakumar N, Marstad A, et al. Global  
401            assessment of *Mycobacterium avium* subsp. *hominissuis* genetic requirement for  
402            growth and virulence. mSystems. 2019;4:e00402-19.
- 403            14. Bruffaerts N, Vluggen C, Roupie V, Duytschaever L, Van den Poel C, Denoël J, et al.  
404            Virulence and immunogenicity of genetically defined human and porcine isolates of  
405            *M. avium* subsp. *hominissuis* in an experimental mouse infection. PLoS One.  
406            2017;12:e0171895.
- 407            15. [dx.doi.org/10.17504/protocols.io.bujenuje](https://doi.org/10.17504/protocols.io.bujenuje)
- 408            16. [dx.doi.org/10.17504/protocols.io.bupvvnv6](https://doi.org/10.17504/protocols.io.bupvvnv6)
- 409            17. Chen ZH, Butler WR, Baumstark BR, Ahearn DG. Identification and differentiation of  
410            *Mycobacterium avium* and *M. intracellulare* by PCR. J Clin Microbiol. 1996;34:1267-9.

- 411 18. Kim BJ, Lee SH, Lyu MA, Kim SJ, Bai GH, Chae GT, et al. Identification of mycobacterial  
412 species by comparative sequence analysis of the RNA polymerase gene (*rpoB*). J Clin  
413 Microbiol. 1999;37:1714-20.
- 414 19. Turenne CY, Semret M, Cousins, DV, Collins DM, Behr MA. Sequencing of *hsp65*  
415 distinguishes among subsets of the *Mycobacterium avium* complex. J. Clin. Microbiol.  
416 2006;44:433-40.
- 417 20. Ahrens P, Giese SB., Klausen J, Inglis NF. Two markers, IS901-IS902 and p40,  
418 identified by PCR and by using monoclonal antibodies in *Mycobacterium avium*  
419 strains. J Clin Microbiol.1995;33:1049-53.
- 420 21. Kunze ZM, Wall S, Appelberg R, Silva MT, Portaels F, McFadden JJ. IS901, a new  
421 member of a widespread class of atypical insertion sequences, is associated with  
422 pathogenicity in *Mycobacterium avium*. Mol Microbiol. 1991;5:2265-72.
- 423 22. Sanderson JD, Moss MT, Tizard ML, Hermon-Taylor J. *Mycobacterium*  
424 *paratuberculosis* DNA in Crohn's disease tissue. Gut. 1992;33:890-6.
- 425 23. Siguier P, Perochon J, Lestrade L, Mahillon J. Chandler M. ISfinder: the reference  
426 center for bacterial insertion sequences. Nucleic Acids Res. 2006;34:D32-6.
- 427 24. Nurk S, Bankevich A, Antipov D, Gurevich AA, Korobeynikov A, Lapidus A, et al.  
428 Assembling single-cell genomes and mini-metagenomes from chimeric MDA  
429 products. J Comput Biol. 2013;20:714-37.
- 430 25. Walker BJ, Abeel T, Shea T, Priest M, Abouelliel A, Sakthikumar S, et al. Pilon: an  
431 integrated tool for comprehensive microbial variant detection and genome assembly  
432 improvement. PLoS One. 2014;9:e112963.
- 433 26. Wick RR, Judd LM, Gorrie CL, Holt KE. Unicycler: Resolving bacterial genome  
434 assemblies from short and long sequencing reads. PLoS Comput Biol.  
435 2017;13:e1005595.

- 436 27. Parks DH, Imelfort M, Skennerton C T, Hugenholtz P, Tyson GW. CheckM: assessing  
437 the quality of microbial genomes recovered from isolates, single cells, and  
438 metagenomes. *Genome Res.* 2015;25:1043-55.
- 439 28. Menzel P, Ng KL, Krogh A. Fast and sensitive taxonomic classification for  
440 metagenomics with Kaiju. *Nat Commun.* 2016;7:11257.
- 441 29. Eren AM, Esen ÖC, Quince C, Vineis JH, Morrison HG, Sogin ML, Anvi'o: an advanced  
442 analysis and visualization platform for 'omics data. *PeerJ.* 2015;3:e1319.
- 443 30. Tatusova T, DiCuccio M, Badretdin A, Chetvernin V, Nawrocki EP, Zaslavsky L, et al.  
444 NCBI prokaryotic genome annotation pipeline. *Nucleic Acids. Res.* 2016;44:6614-24.
- 445 31. Richter M, Rosselló-Móra R, Oliver Glöckner F, Peplies J, Rosselló-Móra R, Oliver  
446 Glöckner F, et al. JSpeciesWS: a web server for prokaryotic species circumscription  
447 based on pairwise genome comparison. *Bioinformatics.* 2016;32:929-31.
- 448 32. Roer L, Hendriksen RS, Leekitcharoenphon P, Lukjancenko O, Kaas RS, Hasman H, et  
449 al. Is the Evolution of *Salmonella enterica* subsp. *enterica* Linked to Restriction-  
450 Modification Systems? *mSystems.* 2016;1:e00009-16.
- 451 33. Couvin D, Bernheim A, Toffano-Nioche C, Touchon M, Michalik J, Néron B, et al.  
452 CRISPRCasFinder, an update of CRISPRFinder, includes a portable version, enhanced  
453 performance and integrates search for Cas proteins. *Nucleic Acids Res.*  
454 2018;46:W246-51.
- 455 34. Grissa I, Vergnaud G, Pourcel C. CRISPRFinder: a web tool to identify clustered  
456 regularly interspaced short palindromic repeats. *Nucleic Acids Res.* 2007;35:W52-7.
- 457 35. Lowe TM, Chan PP. tRNAscan-SE On-line: integrating search and context for analysis  
458 of transfer RNA genes. *Nucleic Acids Res.* 2016;44:W54-7.
- 459 36. Morgado SM, Vicente ACP. Beyond the Limits: tRNA array units in *Mycobacterium*  
460 genomes. *Front Microbiol.* 2018;9:1042.

- 461 37. Liu B, Zheng D, Jin Q, Chen L, Yang J. VFDB 2019: a comparative pathogenomic  
462 platform with an interactive web interface. *Nucleic Acids Res.* 2019;47:D687-92.
- 463 38. Alcock BP, Raphenya AR, Lau TTY, Tsang KK, Bouchard M, Edalatmand A, et al. CARD  
464 2020: antibiotic resistome surveillance with the comprehensive antibiotic resistance  
465 database. *Nucleic Acids Res.* 2020;48:D517-25.
- 466 39. Ichikawa K, Yagi T, Moriyama M, Inagaki T, Nakagawa T, Uchiya KI, et al.  
467 Characterization of *Mycobacterium avium* clinical isolates in Japan using subspecies-  
468 specific insertion sequences, and identification of a new insertion sequence, ISMav6.  
469 *J Med Microbiol.* 2009;58:945-50.
- 470 40. Mijs W, de Haas P, Rossau R, Van der Laan T, Rigouts L, Portaels F, et al. Molecular  
471 evidence to support a proposal to reserve the designation *Mycobacterium avium*  
472 subsp. *avium* for bird-type isolates and '*M. avium* subsp. *hominissuis*' for the  
473 human/porcine type of *M. avium*. *Int J Syst Evol Microbiol.* 2002;52:1505-18.
- 474 41. Hibiya K, Kazumi Y, Nishiuchi Y, Sugawara I, Miyagi K, Oda Y, et al. Descriptive  
475 analysis of the prevalence and the molecular epidemiology of *Mycobacterium avium*  
476 complex-infected pigs that were slaughtered on the main island of Okinawa. *Comp*  
477 *Immunol Microbiol Infect Dis.* 2010;33:401-21.
- 478 42. Matern WM, Bader JS, Karakousis PC. Genome analysis of *Mycobacterium avium*  
479 subspecies *hominissuis* strain 109. *Sci Data.* 2018;5:180277.
- 480 43. Uchiya K, Takahashi H, Yagi T, Moriyama M, Inagaki T, Ichikawa K, et al. Comparative  
481 genome analysis of *Mycobacterium avium* revealed genetic diversity in strains that  
482 cause pulmonary and disseminated disease. *PLoS One.* 2013;8:e71831.
- 483 44. Gorla P, Plocinska R, Sarva K, Satsangi AT, Pandeeti E, Donnelly R, et al. *MtrA*  
484 response regulator controls cell division and cell wall metabolism and affects  
485 susceptibility of *Mycobacteria* to the first line antituberculosis drugs. *Front Microbiol.*  
486 2018;9:2839.

- 487 45. Newell KV, Thomas DP, Brekasis D, Paget MS. The RNA polymerase-binding protein  
488 *RbpA* confers basal levels of rifampicin resistance on *Streptomyces coelicolor*. Mol  
489 Microbiol. 2006;60:687-96.
