## 1 **Data Release**

2

3 Genomic features of *Mycobacterium avium* subsp. *hominissuis* isolated from pigs in Japan.

4

5 Tetsuya Komatsu<sup>1¶</sup>, Kenji Ohya<sup>2,3¶#</sup>, Atsushi Ota<sup>4</sup>, Yukiko Nishiuchi<sup>5</sup>, Hirokazu Yano<sup>6</sup>, Kayoko  
6 Matsuo<sup>7</sup>, Justice Opore Odoi<sup>3</sup>, Shota Sukanuma<sup>2##</sup>, Kotaro Sawai<sup>2,8</sup>, Akemi Hasebe<sup>9</sup>, Tetsuo  
7 Asai<sup>3</sup>, Tokuma Yanai<sup>2, 3, 10</sup>, Hideto Fukushi<sup>2, 3</sup>, Takayuki Wada<sup>11</sup>, Shiomi Yoshida<sup>12</sup>, Toshihiro  
8 Ito<sup>13</sup>, Kentaro Arikawa<sup>14</sup>, Mikihiro Kawai<sup>15</sup>, Manabu Ato<sup>16</sup>, Anthony D Baughn<sup>17</sup>, Tomotada  
9 Iwamoto<sup>14</sup>, Fumito Maruyama<sup>5, 18, 19\*</sup>

10

## 11 **Affiliations**

12 1. Aichi Prefectural Chuo Livestock Hygiene Service Center, Okazaki, Aichi, Japan

13 2. Faculty of Applied Biological Sciences, Gifu University, Gifu, Gifu, Japan

14 3. United Graduate School of Veterinary Sciences, Gifu University, Gifu, Gifu, Japan

15 4. Data Science Center, Division of Biological Science, Nara Institute of Science and  
16 Technology, Ikoma, Nara, Japan

17 5. Office of Academic Research and Industry-Government Collaboration, Hiroshima  
18 University, Higashi-Hiroshima, Hiroshima, Japan

19 6. Graduate School of Life Sciences, Tohoku University, Sendai, Miyagi, Japan

20 7. Kumamoto Prefectural Aso Public Health Center, Aso, Kumamoto, Japan

21 8. Viral Disease and Epidemiology Research Division, National Institute of Animal Health,  
22 National Agriculture Research Organization, Tsukuba, Ibaraki, Japan

23 9. Toyama Prefectural Meat Inspection Center, Imizu, Toyama, Japan

24 10. Hiwa Natural History Museum, Shobara, Hiroshima, Japan

25 11. Graduate School of Human Life Science, Osaka City University, Osaka, Osaka, Japan

26 12. Clinical Research Center, National Hospital Organization Kinki-Chuo Chest Medical Center,  
27 Sakai, Osaka, Japan

28 13. Laboratory of Proteome Research, Proteome Research Center, National Institutes of  
29 Biomedical Innovation, Health and Nutrition, Ibaraki, Osaka, Japan

30 14. Department of Infectious Diseases, Kobe Institute of Health, Kobe, Hyogo, Japan

31 15. Graduate School of Human and Environmental Studies, Kyoto University, Kyoto, Kyoto,  
32 Japan

33 16. Department of Mycobacteriology, Leprosy Research Center, National Institute of  
34 Infectious Diseases, Higashimurayama, Tokyo, Japan

35 17. Department of Microbiology and Immunology, University of Minnesota Medical School,  
36 Minneapolis, Minnesota, USA

37 18. Project Research Center for Holobiome and Built Environment (CHOBE), Hiroshima  
38 University, Higashi-Hiroshima, Hiroshima, Japan

39 19. Scientific and Technological Bioresource Nucleus, Universidad de La Frontera, Temuco,  
40 Chile

41

42 <sup>#</sup>Current Address: National Institute of Health Sciences, Kawasaki, Kanagawa, Japan

43 <sup>##</sup>Current Address: Central Research Institute for Feed and Livestock of Zen-noh, Tsukuba,  
44 Ibaraki, Japan

45 <sup>¶</sup>These authors contributed equally to this work.

46

47 corresponding author(s): Fumito Maruyama ([fumito@hiroshima-u.ac.jp](mailto:fumito@hiroshima-u.ac.jp))

48

49 E-mail addresses and ORCID IDs:

50 Tetsuya Komatsu: [gsbqm670@yahoo.co.jp](mailto:gsbqm670@yahoo.co.jp), 0000-0002-6207-5783

51 Kenji Ohya: [kenji.ohya@kkd.biglobe.ne.jp](mailto:kenji.ohya@kkd.biglobe.ne.jp), 0000-0002-8867-3618

- 52 Atsushi Ota: [level997@gmail.com](mailto:level997@gmail.com)
- 53 Yukiko Nishiuchi: [nishiuchi@hiroshima-u.ac.jp](mailto:nishiuchi@hiroshima-u.ac.jp), 0000-0002-2973-9285
- 54 Hirokazu Yano: [yano.hirokazu@ige.tohoku.ac.jp](mailto:yano.hirokazu@ige.tohoku.ac.jp), 0000-0001-5144-3459
- 55 Kayoko Matsuo: [alaeuris@violin.ocn.ne.jp](mailto:alaeuris@violin.ocn.ne.jp)
- 56 Justice Opare Odoi: [wentworthprince@yahoo.com](mailto:wentworthprince@yahoo.com), 0000-0002-4109-1215
- 57 Shota Suganuma: [suganuma-shouta@zennoh.or.jp](mailto:suganuma-shouta@zennoh.or.jp)
- 58 Kotaro Sawai: [sawaik107@affrc.go.jp](mailto:sawaik107@affrc.go.jp), 0000-0003-1085-5144
- 59 Akemi Hasebe: [akemi.hasebe@pref.toyama.lg.jp](mailto:akemi.hasebe@pref.toyama.lg.jp)
- 60 Tetsuo Asai: [tasai@gifu-u.ac.jp](mailto:tasai@gifu-u.ac.jp), 0000-0002-6556-9674
- 61 Tokuma Yanai: [tukumayanai@gmail.com](mailto:tukumayanai@gmail.com), 0000-0002-1118-5771
- 62 Hideto Fukushi: [hfukushi@gifu-u.ac.jp](mailto:hfukushi@gifu-u.ac.jp)
- 63 Takayuki Wada: [twada@osaka-cu.ac.jp](mailto:twada@osaka-cu.ac.jp), 0000-0002-7023-7455
- 64 Shiomi Yoshida: [yoshida.shiomi.vg@mail.hosp.go.jp](mailto:yoshida.shiomi.vg@mail.hosp.go.jp), 0000-0002-8197-3829
- 65 Toshihiro Ito: [toshihiroito@nibiohn.go.jp](mailto:toshihiroito@nibiohn.go.jp)
- 66 Kentaro Arikawa: [kentaro\\_arikawa@office.city.kobe.lg.jp](mailto:kentaro_arikawa@office.city.kobe.lg.jp)
- 67 Mikihiko Kawai: [kawai.mikihiko.8c@kyoto-u.ac.jp](mailto:kawai.mikihiko.8c@kyoto-u.ac.jp), 0000-0001-7219-3823
- 68 Manabu Ato: [ato@niid.go.jp](mailto:ato@niid.go.jp), 0000-0002-3178-2645
- 69 Anthony D Baughn: [abaughn@umn.edu](mailto:abaughn@umn.edu), 0000-0003-1188-4238
- 70 Tomotada Iwamoto: [kx2t-iwmt@asahi-net.or.jp](mailto:kx2t-iwmt@asahi-net.or.jp), 0000-0002-2650-0308
- 71 Fumito Maruyama: [fumito@hiroshima-u.ac.jp](mailto:fumito@hiroshima-u.ac.jp), 0000-0003-2347-616X

72

## 73 **Abstract**

74 *Mycobacterium avium* subsp. *hominissuis* (MAH) is one of the most important agents causing  
75 non-tuberculosis mycobacterial infection in humans and pigs. Genome analysis on MAH of  
76 human isolates has been proceeding, however, those of pigs are limited despite its potential  
77 source of infection to human. In the current study, we obtained 30 draft genome sequences

78 of MAH of pigs reared in Japan. The 30 draft genomes consisted of 4,848,678 – 5,620,788 bp  
79 length, 4,652 – 5,388 coding genes and 46 – 75 (Med: 47) tRNAs. All isolates had restriction  
80 modification associated genes and 185 – 222 predicted virulence genes. Two isolates had  
81 tRNA arrays and one isolate had a clustered regularly interspaced short palindromic repeat  
82 (CRISPR) region. Our results will be useful for evaluation of the ecology of MAH by providing  
83 a foundation for genome-based epidemiological studies.

84

85 Research Areas: Microbiology

86 Classification: Molecular Genetics, Microbial Ecology

87

88

## 89 **Data description**

### 90 **Context**

91 To date, incidence of infection caused by non-tuberculous mycobacteria (NTM) has been  
92 increasing all over the world [1]. Among NTMs, *Mycobacterium avium* complex (MAC) is one  
93 of the most critical agents. MAC has 4 subspecies, namely *M. avium* subsp. *avium* (MAA), *M.*  
94 *avium* subsp. *paratuberculosis* (MAP), *M. avium* subsp. *silvaticum* (MAS) and *M. avium* subsp.  
95 *hominissuis* (MAH). MAH is known as a major pathogen for humans, causing lung disease and  
96 sometimes disseminated infection in immune suppressed patients [2, 3]. MAH is also a main  
97 causative agent of mycobacteriosis in pigs [4], showing mesenteric and mandibular  
98 lymphadenitis [5] and sometimes systemic infection [6]. Swine mycobacteriosis exerts severe  
99 economic impact in affected farms. MAH infected pigs are suspected as potential risk for  
100 human infection [7, 8, 9, 10].

101 Recently, genomic epidemiological study of MAH has extensively progressed. In our recent  
102 studies, MAH is divided into 6 major lineages (MahEastAsia1, MahEastAsia2, SC1 - SC4) and  
103 each lineage is predominant in specific regions on a global scale [11, 12]. For example, the

104 MahEastAsia1 and MahEastAsia2 are frequently isolated from human lung disease in Japan  
105 and Korea although SC1 – 4 are isolated from America and Europe [11, 12]. Japanese pig  
106 isolates are mainly classified into 2 lineages, SC2 and SC4 [11, 12]. However, from the one  
107 health point of view, to exactly clarify the ecology of MAH, the number of pig isolates used in  
108 these studies was insufficient.

109 As stated above, genome-based analysis of MAH has been proceeding and the most  
110 essential genes of MAH are thought to be mutual orthologues of genes in *Mycobacterium*  
111 *tuberculosis* (MTB) [13]. Although components of virulence systems have been investigated  
112 [14], reports about genome contents, even drug resistance genes are not available, despite  
113 the increasing the incidence of MAH disease [1]. To understand MAH evolution, distribution  
114 and to promote the identification of targets for antimicrobial drug discovery, the  
115 characterization of the defining genomic features of MAH is essential.

116 Here we obtained draft genome sequences of 30 MAH isolates derived from pigs reared in  
117 Japan, and identified genome features for bacterial defense systems, such as restriction  
118 modification (RM) system, clustered regularly interspaced short palindromic repeat (CRISPR),  
119 tRNA arrays, virulence factors and drug resistance genes. Our results in this study may  
120 provide a way to understand the epidemiological relationship of MAH in human and pigs.

121

## 122 **Methods**

### 123 a) Sampling

124 MAH isolates were collected from pigs reared at two areas, Tokai and Hokuriku in Japan,  
125 where about 10 % of pigs in Japan are reared. 48 mesenteric or mandibular lymph nodes of  
126 pigs reared in Tokai area were collected from Gifu meat inspection center from July –  
127 December, 2015. Samples (20: mesenteric lymph nodes, 1: mandibular lymph nodes, 1: liver)  
128 of Tokai and Hokuriku area were collected between August, 1998 – Mar, 2018 and archived  
129 in Toyama meat inspection center.

130

131 b) Bacterial isolation and DNA extraction

132 The method of bacterial isolation was available in protocols. io [15]. The mesenteric or  
133 mandibular lymph nodes with mycobacterial granulomatous lesions were mixed with 400ul  
134 of 2% NaOH and incubated at room temperature overnight. The samples were spread onto  
135 2% Ogawa medium (Kyokuto Pharmaceutical, Tokyo, Japan) and incubated at 37 °C for 3 – 4  
136 weeks. A single colony was inoculated onto 7H11 broth with 10% oleic acid-albumin-  
137 dextrose-catalase as a supplement. The isolates were stored with Microbank (Pro Lab  
138 Diagnostics Inc., Richmond Hill, ON, Canada) at -80°C. The method of extraction of genomic  
139 DNA was also available in protocols. io [16]. In brief, cells were delipidated by treatment with  
140 acetone, then lysed by lysozyme and Proteinase K. Genomic DNA was extracted by  
141 phenol/chloroform treatment of the lysates.

142

143 c) Identification of MAH and insertion sequence profile

144 PCR amplification of *M. avium* 16S rRNA genes (MAV) was conducted for screening [17].  
145 Isolates positive for MAV were identified by sequencing *hsp65* and *rpoB* genes [18, 19]. Basic  
146 Local Alignment Search Tool (BLAST) analysis was conducted using partial sequences of *rpoB*  
147 gene. Phylogenetic analysis of both genes was conducted by maximum likelihood method  
148 using Molecular Evolutionary Genetics Analysis (MEGA) software ver. 7.0. Bootstrap values  
149 were calculated from 1,000 replications. Insertion sequence patterns of IS900, IS901, IS902  
150 and IS1245 were performed as described previously [20, 21, 22]. IS1311 and IS1613 were  
151 searched for within draft genomes by using ISfinder (<https://isfinder.biotoul.fr>) with default  
152 parameters [23].

153

154 d) Draft genome sequences and genome annotation

155 Extraction of genomic DNA was described above. An average 350-bp paired-end libraries  
156 were prepared from extracted genomic DNA by TruSeq DNA PCR-Free High Throughput  
157 Library Prep Kit (Illumina, San Diego, CA, USA). Pair-end sequencing (2× 150-bp) was  
158 conducted using the HiSeq X Ten sequencing platform (Illumina) at the Beijing Genomics  
159 Institute (Shenzhen, China). Output reads were trimmed by TrimGalore!  
160 (<https://github.com/FelixKrueger/TrimGalore>) and were corrected its mismatched reads by  
161 SPAdes ver 3.12.0. [24]. The reads were assembled and polished using Pilon [25] and  
162 Unicycler [26], and then genome completeness was estimated by CheckM [27]. Taxonomic  
163 classification of contigs was carried out using Kaiju [28] and Anvi'o [29]. Draft genome  
164 sequences were annotated via the National Center for Biotechnology Information (NCBI)  
165 Prokaryotic Genome Annotation Pipeline (PGAP) [30].

166

167 e) Detection of bacterial defence systems (RM system and CRISPR CAS system) in MAH  
168 genome

169 RM systems were determined by online tool, Restriction-ModificationFinder version 1.1  
170 (<https://cge.cbs.dtu.dk/services/Restriction-ModificationFinder/>) twice with the following  
171 settings (1: database: All incl. putative genes, threshold for %ID: 90%, minimum length: 80%  
172 to search the RM system of MAH and 2: database: All, threshold for %ID: 10%, minimum  
173 length: 20% to confirm the orthologue of MTB or the other Mycobacteria) [31]. CRISPR Cas  
174 systems were identified by the online tool CRISPRCasFinder program  
175 (<https://crisprcas.i2bc.paris-saclay.fr/CrisprCasFinder/Index>) with default setting [32, 33].

176

177 f) Detection of tRNA arrays in MAH genome

178 Total number of tRNAs in this study were retrieved from gb files annotated by PGAP. Draft  
179 genomes of GM17 and OCU479 isolates, which had more tRNAs than the others (Table 1),  
180 were inspected by tRNAscan-SE (<http://lowelab.ucsc.edu/tRNAscan-SE/>) to search tRNA  
181 arrays [34]. tRNA gene isotype synteny (expressed by the single-letter amino acid code) of  
182 both isolates and the reference strains were aligned and used for the maximum likelihood  
183 method by MEGA 7.0. Classification of both isolates was conducted as previously described  
184 [35].

185

186 g) Detection of virulence factors and drug resistance genes

187 Virulence genes were identified by using VFAnalyzer (<http://www.mgc.ac.cn/VFs/main.htm>)  
188 [36]. We selected the following settings, genus: *Mycobacterium*, specify a representative  
189 genome: *M. avium* 104 and choose genomes for comparison: blank and draft genome fasta  
190 files were uploaded. Drug resistance genes were identified by Resistance Gene Identifier  
191 (RGI) version 5.1.0 (<https://card.mcmaster.ca/analyze/rgi>) with the following settings, Select  
192 Data Type: DNA sequence, Select Criteria: Perfect and Strict hit only, Nudge  $\geq 95\%$  identity  
193 Loose hits to Strict: Exclude nudge, Sequence Quality: high quality/coverage [37]. To confirm  
194 the existence of mutations detected by RGI, we retrieved the respective drug resistance  
195 associated genes from draft genome sequences, aligned by MEGA 7.0., and then manually  
196 checked for mutations in the nucleotide sequences.

197

198 **Data Validation and quality control**



199 Identification of MAH

200 The experimental workflow from sampling to identification is shown in Fig. 1. We  
201 successfully obtained 13 MAH isolates derived from Tokai area and 8 out of 13 isolates (GM5  
202 – GM44) with 22 isolates of Tokai and Hokuriku area (OCU467 – OCU486, Toy194, Toy195)  
203 were used for draft genome sequence analysis. We conducted multiple examinations to  
204 determine the isolates as MAH, IS possession patterns, sequence analysis of *hsp65*  
205 (Supplementary Table 1). Among MAH subspecies, the patterns of IS possession is different  
206 and is used for subspecies identification [38]. *IS900* and *IS901* are known as the indicator of  
207 MAP and MAA, respectively [21, 22]. MAH is usually positive for *IS1245* [39], and is negative  
208 for *IS900*, *IS901* and *IS902* [20], however, MAH strains without *IS1245* are frequently  
209 distributed in Japan [39, 40]. In our study, 10/30 isolates were negative for *IS1245* (33.3%)  
210 and none had *IS900*, *IS901* and *IS902* (Supplementary Table 1). In general, subspecies of *M.*  
211 *avium* is also identified by *hsp65* gene analysis, which had 17 variations of SNP among  
212 subspecies [19]. MAH has usually 1, 2, 3, 7, 8 or 9 *hsp* code [19], however, five isolates had  
213 unclassified *hsp* code (indicated by N) in this study (Supplementary Table 1). Therefore, we  
214 also conducted partial sequence analysis of the *rpoB* gene and the isolates were identified as  
215 MAH by BLAST analysis. In addition, we conducted phylogenetic analysis based on *hsp65* and  
216 *rpoB* genes retrieved from draft genome and all isolates in this study were also classified into  
217 MAH (Fig 2). All of these examinations confirmed that our isolates were MAH.

218

219 Draft genome data

220 All of our draft genome sequences had a total length between 4.85 – 5.62 Mb, similar to  
221 complete MAH genomes [41, 42]. All isolates had over 24kb N50 and over 40 fold genome  
222 coverage (average 233) (Table 1).

223

224 Genome content analysis

225 In total, we identified 73 putative RM systems, including 24 type I RM systems, 48 type II RM  
226 systems, and 1 type III RM systems (Supplementary Table 2). All isolates had at least one  
227 Type II RM system and GM5, GM16, GM17, OCU468 – OCU470, OCU472, OCU473, OCU475,  
228 OCU476, OCU479, OCU483 and OCU484 had Type I, Type II RM systems, and GM44 had 3  
229 types of RM systems. In these RM systems, 7 RM systems had homologues in MTB and 30  
230 RM systems had homologues in *M. kansasii*. Orphan methyltransferase was detected in  
231 OCU473 and OCU479. CRISPR was detected only in GM44 (Supplementary Table 3). The  
232 sequences of the region were identical to MAH 104 (Query Cover: 100%, E value: 0.0, Per.  
233 Ident: 99.99%) which is the only MAH strain that had an intact CRISPR in the database  
234 (<https://crisprcas.i2bc.paris-saclay.fr/MainDb/StrainList>). The isolates had 185 – 222  
235 virulence factors and 141 factors were common in all isolates (Supplementary Table 4). All  
236 isolates shared the same 2 drug resistance genes, *mtrA* which is associated with cell division  
237 and cell wall integrity [43] and resistance to macrolide antibiotics, and *RbpA* which regulates  
238 bacterial transcription and is associated with rifampicin resistance (Supplementary Table 5)  
239 [44]. In addition, single nucleotide polymorphisms (SNP) associated with drug resistance  
240 were found. All isolates had a C117D change in the *murA* gene conferring resistance to  
241 fosfomycin. A A2274G mutation in the *Mycobacterium avium* 23S rRNA which contributes to  
242 macrolide resistance was also detected by RGI, but when we examined the aligned  
243 nucleotide sequence, no point mutation was found in all isolates (Supplementary Table 5).  
244 CRISPR, virulence factor and drug resistance genes were selected from online tools. Original  
245 databases of each tool used in this study were updated in 2020, suggesting our data are  
246 based on the forefront of existing knowledge.

247

248 tRNA arrays

249 tRNA arrays were detected in isolates GM17 and OCU479 (Supplementary Table 6). tRNA  
250 array was discovered in some MAH isolates in the past study, and phylogenetic analysis

251 based on nucleotide sequences of tRNA array showed that tRNA array of MAH was classified  
252 into a specific group [35]. To confirm tRNA arrays in this study as authentic tRNA arrays,  
253 phylogenetic analysis was performed. Our tRNA arrays were classified into the group 3, as  
254 defined in a previous study (Fig. 3) [35].

255

## 256 **Re-use potential**

257 MAH is known as one of the most critical *M. avium* subspecies causing non-tuberculosis  
258 mycobacterial infection in human and pigs. Pigs are suspected to be the most dominant host  
259 of MAH in animal and a potential source of infection for human [7, 8, 9, 10]. However, the  
260 study about relationship with human and pig MAH isolates based on genome is limited [11,  
261 12]. Our study provides 30 draft genome sequences of MAH isolated from pigs. We believe  
262 that these data will be useful for genome-based epidemiological studies to evaluate the  
263 importance of pigs as a source of infection. In addition, we provide molecular identification  
264 of defense systems, tRNA arrays, virulence factors and drug resistance genes. These data are  
265 expected to be used in future research of MAH classification, pathogenicity, and  
266 identification of antimicrobial drug targets. Principally, our draft genomes were derived from  
267 both cases of systemic and lymph node limited infection of MAH. Thus, the provided  
268 virulence factors can be included in the important candidate genes associated with systemic  
269 infection of pigs.

270

## 271 **Data Availability**

272 The summary information of draft genomes of the 30 MAH isolates are shown in Table 1. The  
273 genome sizes ranged to from approximately 4.8Mbps to 5.6Mbps. GC content was from  
274 68.77% to 69.26%. All genome sequences have been deposited in GenBank under accession  
275 numbers VRUQ00000000, WEGO00000000 to WEGZ00000000 and WEHA00000000 to

276 WEHQ00000000, and SRA under accession numbers SRR13521605, SRR13556487 to  
277 SRR13556515.

278

## 279 **Declarations**

### 280 **List of abbreviations**

281 NTM: non-tuberculous mycobacteria; MAC: *Mycobacterium avium* complex; MAA: *M. avium*  
282 subsp. *avium*; MAP: *M. avium* subsp. *paratuberculosis*; MAS: *M. avium* subsp. *silvaticum*;  
283 MAH: *Mycobacterium avium* subsp. *hominissuis*; MTB: *Mycobacterium tuberculosis*; RM:  
284 restriction modification; CRISPR: clustered regularly interspaced short palindromic repeat;  
285 BLAST: Basic Local Alignment Search Tool; MEGA: Molecular Evolutionary Genetics Analysis;  
286 NCBI: National Center for Biotechnology Information; PGAP: Prokaryotic Genome Annotation  
287 Pipeline; SNP: single nucleotide polymorphism

288

### 289 **Consent for publication**

290 Not applicable.

291

### 292 **Competing interests**

293 The authors declare no competing interests.

294

### 295 **Funding**

296 This research was supported by a grant from the Japan Agency for Medical Research and  
297 Development (AMED)(17fk0108116h040 and 21fk0108129h0502), the Japan Racing  
298 Association (JRA) Livestock Industry Promotion Project (H28-29\_239, H29-30\_7) of the JRA, a  
299 grant for Meat and Meat Products (H28-130, H30-60] managed by the Ito Foundation for  
300 research in design study, collection, analysis; and was supported by grants from the Japan  
301 Society for the Promotion of Science (JSPS) KAKENHI (JP26304039, JP18K19674, 16H05501,

302 16H01782, 20H00562). JOO is a recipient of a Japanese Ministry of Education, Culture, Sports,  
303 Science and Technology (MEXT) scholarship.

304

### 305 **Author's contributions**

306 T.K, K.O and H.Y wrote the manuscript. K.M, A.H, S.S and K.S collected samples. K.O, J.O.O,  
307 S.S and K.S performed laboratory works. T.K, K.O, A.O, H.Y, J.O.O, T.Ito and M.K conducted  
308 computational analysis. Y.N, T.A, T.Y, H.F, T.W, S.Y, K.A designed methods. M.A, A.D.B, K.O,  
309 N.Y, T.Iwamoto and F.M designed whole research and advised on the interpretation of the  
310 study's findings. All authors reviewed the manuscript.

311

### 312 **Acknowledgements**

313 We thank the member of Gifu central hygiene service center and Toyama meat inspection  
314 center for sampling. Computational resources were partly provided by the Data Integration  
315 and Analysis Facility, National Institute for Basic Biology, Japan.

316

### 317 **Figure Legends**

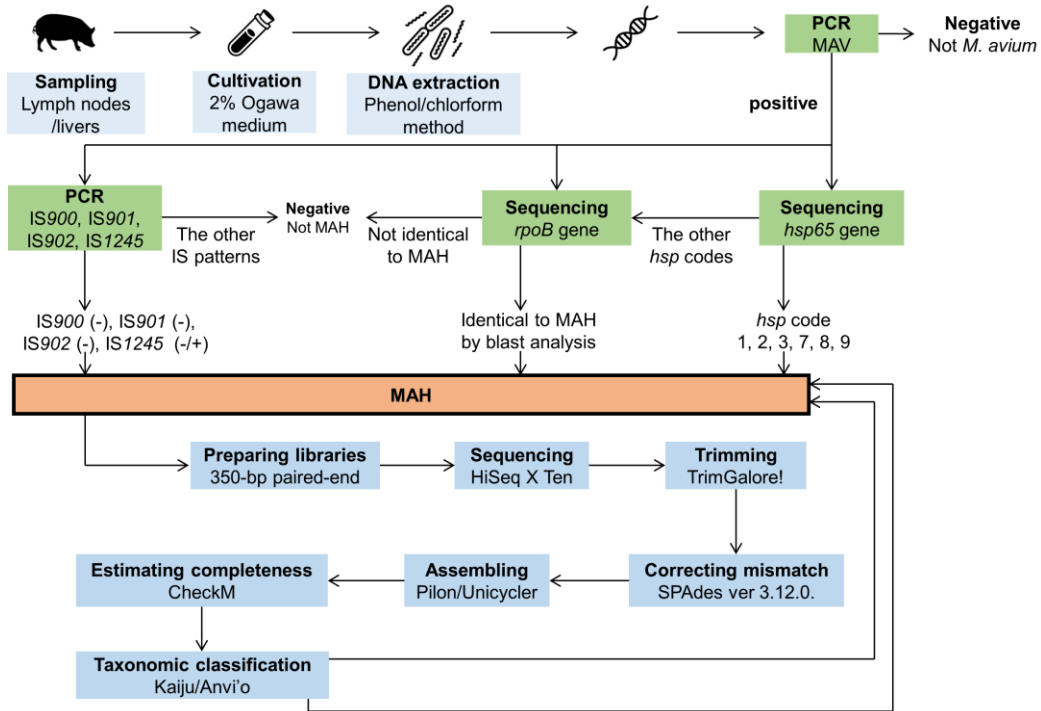

318

319 **Figure 1. The experimental workflows in this study.**

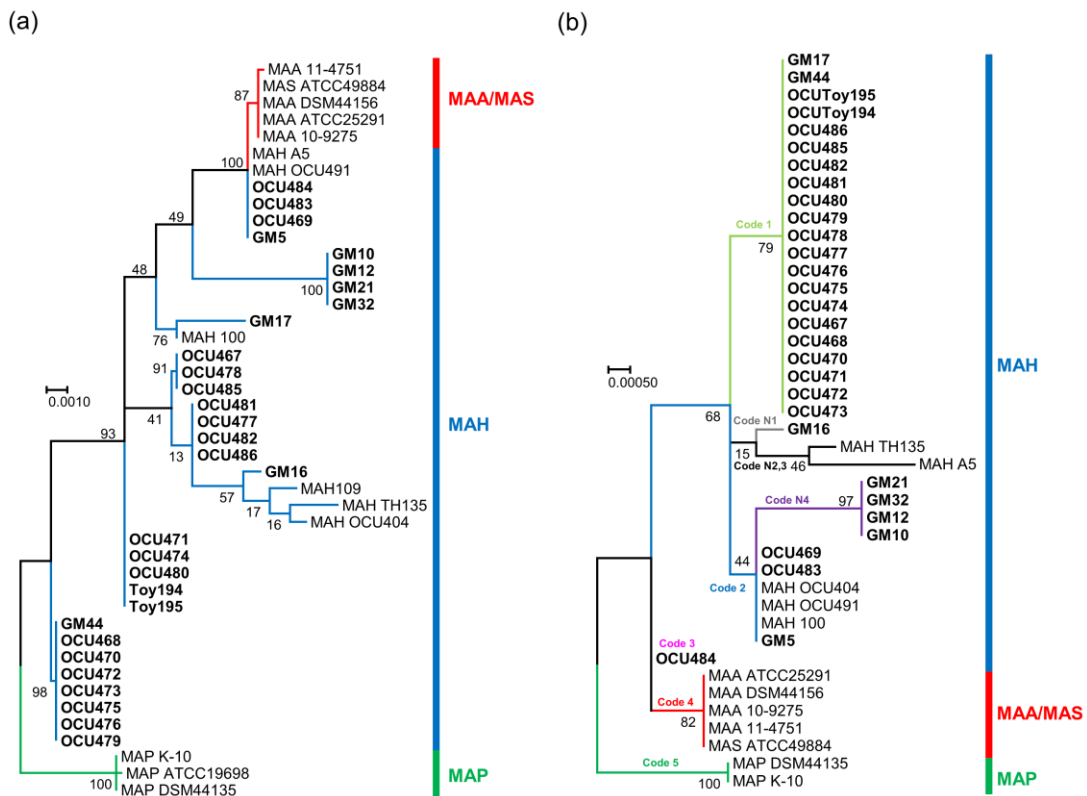

320

321 **Figure 2. Phylogenetic analysis based on *rpoB* gene and *hsp65* gene.** Phylogenetic tree was  
322 generated by maximum likelihood method using MEGA 7.0. All isolates in this study are  
323 indicated in bold font. **(a)** 30 MAH isolates in this study were classified as MAH and were  
324 differentiated from MAP and MAA/MAS node. **(b)** All the isolates in this study were classified  
325 into 5 *hsp* code, code 1, 2, 3, N1 and N4. These isolates were differentiated from MAP and  
326 MAA/MAS nodes. The bootstrap values were determined from 1,000 replications. The scale  
327 bar indicates genetic distances among strains.

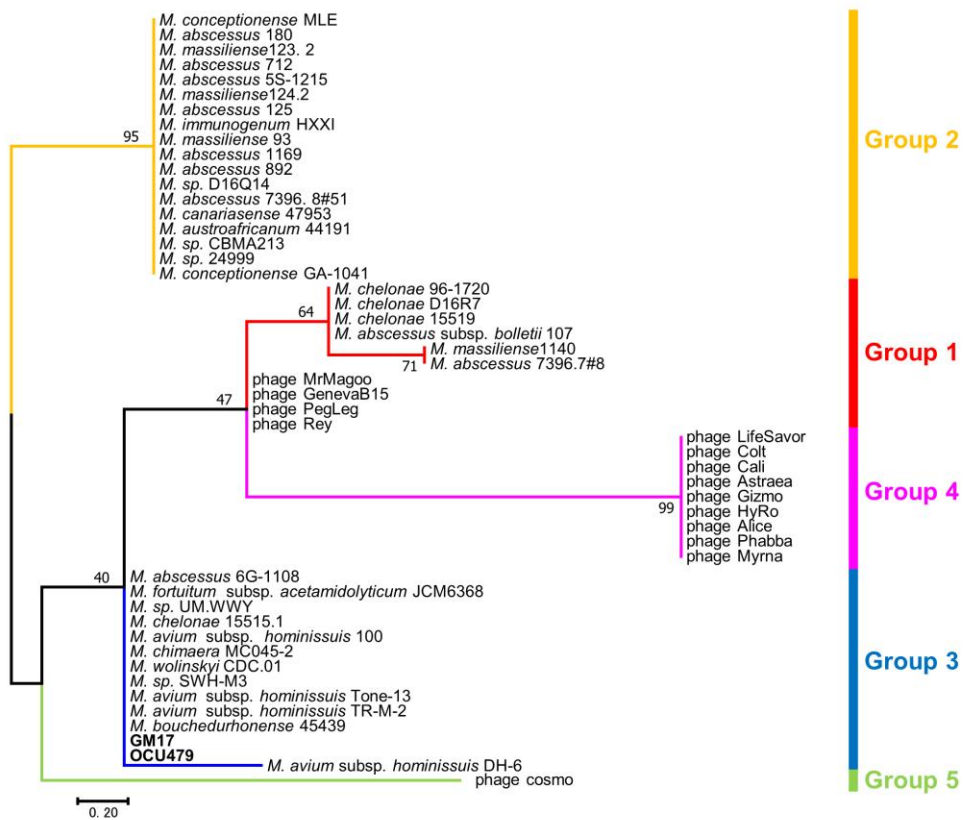

328  
329 **Figure 3. Phylogenetic tree based on the sequence of tRNA isotype located in tRNA array.**  
330 Phylogenetic tree was generated by maximum likelihood method using MEGA 7.0. Two  
331 isolates (GM17 and OCU479 indicated in bold) were classified in Group 3. The bootstrap  
332 values were determined from 1,000 replications. The scale bar indicates genetic distances  
333 among strains.

334

335 **Tables**

336 **Table 1. Summary information for the draft genome sequences of 30 MAH isolates in this**  
 337 **study.** \* CDSs: coding sequences.

| Isolate | Genome size<br>(bp) | N50<br>(bp) | Coverage | No. of<br>contig | G+C<br>content (%) | No. of<br>CDSs* | No. of<br>tRNAs |
|---------|---------------------|-------------|----------|------------------|--------------------|-----------------|-----------------|
| GM5     | 5,037,010           | 35,760      | 277      | 224              | 69.06              | 4,877           | 47              |
| GM10    | 4,858,055           | 33,212      | 277      | 248              | 69.16              | 4,708           | 47              |
| GM12    | 4,848,678           | 33,219      | 253      | 261              | 69.17              | 4,732           | 47              |
| GM16    | 5,012,047           | 24,262      | 274      | 346              | 68.84              | 4,981           | 46              |
| GM17    | 5,265,075           | 30,906      | 355      | 289              | 68.77              | 5,190           | 75              |
| GM21    | 4,899,737           | 45,080      | 411      | 216              | 69.20              | 4,734           | 47              |
| GM32    | 4,897,271           | 47,147      | 292      | 208              | 69.20              | 4,712           | 47              |
| GM44    | 5,086,547           | 26,307      | 251      | 316              | 68.95              | 4,780           | 46              |
| OCU467  | 5,110,693           | 243,182     | 207      | 75               | 69.16              | 4,803           | 46              |
| OCU468  | 5,459,638           | 137,464     | 198      | 132              | 68.96              | 5,176           | 46              |
| OCU469  | 5,167,480           | 190,329     | 191      | 57               | 69.19              | 4,886           | 47              |
| OCU470  | 5,388,572           | 124,661     | 220      | 132              | 68.98              | 5,103           | 46              |
| OCU471  | 4,990,913           | 193,095     | 237      | 70               | 69.24              | 4,713           | 47              |
| OCU472  | 5,410,552           | 119,264     | 180      | 139              | 68.97              | 5,163           | 47              |
| OCU473  | 5,237,229           | 105,027     | 232      | 118              | 69.11              | 4,981           | 47              |
| OCU474  | 5,087,878           | 168,670     | 213      | 81               | 69.26              | 4,817           | 47              |
| OCU475  | 5,376,580           | 113,114     | 243      | 130              | 68.99              | 5,121           | 46              |
| OCU476  | 5,359,545           | 133,302     | 268      | 132              | 69.00              | 5,094           | 46              |
| OCU477  | 5,087,664           | 218,065     | 221      | 85               | 69.22              | 4,779           | 47              |
| OCU478  | 5,108,303           | 272,265     | 230      | 73               | 69.17              | 4,803           | 46              |
| OCU479  | 5,620,788           | 112,152     | 167      | 143              | 68.78              | 5,388           | 75              |



|        |           |         |     |     |       |       |    |
|--------|-----------|---------|-----|-----|-------|-------|----|
| OCU480 | 5,088,946 | 195,446 | 53  | 73  | 69.24 | 4,820 | 47 |
| OCU481 | 5,100,722 | 163,519 | 247 | 101 | 69.19 | 4,802 | 47 |
| OCU482 | 5,100,769 | 163,705 | 244 | 99  | 69.19 | 4,800 | 47 |
| OCU483 | 4,943,024 | 200,611 | 228 | 68  | 69.24 | 4,652 | 47 |
| OCU484 | 5,096,430 | 141,792 | 249 | 104 | 69.20 | 4,811 | 47 |
| OCU485 | 5,109,020 | 243,182 | 258 | 80  | 69.16 | 4,805 | 46 |
| OCU486 | 5,023,805 | 234,302 | 40  | 52  | 69.23 | 4,722 | 47 |
| Toy194 | 5,347,524 | 216,164 | 273 | 93  | 68.97 | 5,018 | 47 |
| Toy195 | 5,346,468 | 168,809 | 192 | 103 | 68.97 | 5,029 | 47 |

338

339

340 **Supplementary Table 1. Isolates information and molecular characteristics of 30 MAH in**  
341 **this study.** a: Detected IS was 1213bp and shared 83% identity with IS900.

342

343 **Supplementary Table 2. Restriction modification system detected in 30 MAH isolates in**  
344 **this study.** \*<sup>1</sup>: These genes include the function of restriction enzyme/methyltransferase. \*<sup>2</sup>:  
345 These genes could be orphan methyltransferase. Yellow background: putative genes.

346

347 **Supplementary Table 3. Detected CRISPR-Cas systems in MAH GM44.**

348

349 **Supplementary Table 4. Virulence factors detected in 30 MAH isolates in this study.**

350

351 **Supplementary Table 5. Drug resistance genes detected in 30 MAH isolates in this study.**

352

353 **Supplementary Table 6. The information about tRNA array detected in MAH isolates GM17**  
354 **and OCU479.**

355

356 **References**

- 357 1. Daley CL. *Mycobacterium avium* complex disease. *Microbiol Spectr.* 2017;5.
- 358 2. Uchiya K, Takahashi H, Nakagawa T, Yagi T, Moriyama M, Inagaki T, et al.
- 359 Characterization of a novel plasmid, pMAH135, from *Mycobacterium avium* subsp.
- 360 *hominissuis*. *PLoS One.* 2015;10:e0117797.
- 361 3. Uchiya KI, Asahi S, Futamura K, Hamaura H, Nakagawa T, Nikai T, et al. Antibiotic
- 362 susceptibility and genotyping of *Mycobacterium avium* strains that cause pulmonary
- 363 and disseminated infection. *Antimicrob. Agents Chemother.* 2018;62:e02035-17.
- 364 4. Agdestein A, Johansen TB, Polaček V, Lium B, Holstad G, Vidanović D, et al.
- 365 Investigation of an outbreak of mycobacteriosis in pigs. *BMC Vet Res.* 2011;7;:63.
- 366 5. Agdestein A, Johansen TB, Kolbjørnsen Ø, Jørgensen A, Djønne B, Olsen I, et al. A
- 367 comparative study of *Mycobacterium avium* subsp. *avium* and *Mycobacterium avium*
- 368 subsp. *hominissuis* in experimentally infected pigs. *BMC Vet Res.* 2012;8:11.
- 369 6. Hibiya K, Kasumi Y, Sugawara I Fujita J. Histopathological classification of systemic
- 370 *Mycobacterium avium* complex infections in slaughtered domestic pigs. *Comp*
- 371 *Immunol Microbiol Infect Dis.* 2008;31:347-66 .
- 372 7. Agdestein A, Olsen I, Jørgensen A, Djønne B, Johansen TB. Novel insights into
- 373 transmission routes of *Mycobacterium avium* in pigs and possible implications for
- 374 human health. *Vet Res.* 2014;45:46.
- 375 8. Johansen TB, Olsen I, Jensen MR, Dahle UR, Holstad G, Djønne B. New probes used
- 376 for IS1245 and IS1311 restriction fragment length polymorphism of *Mycobacterium*
- 377 *avium* subsp. *avium* and *Mycobacterium avium* subsp. *hominissuis* isolates of human
- 378 and animal origin in Norway. *BMC Microbiol.* 2007;7:14..

- 379 9. Klanicova B, Slana I, Vondruskova H, Kaevska M, Pavlik I. Real-time quantitative PCR  
380 detection of *Mycobacterium avium* subspecies in meat products. J Food Prot.  
381 2011;74:636-40.
- 382 10. Slana I, Kaevska M, Kralik P, Horvathova A, Pavlik I. Distribution of *Mycobacterium*  
383 *avium* subsp. *avium* and *M. a. hominissuis* in artificially infected pigs studied by  
384 culture and IS901 and IS1245 quantitative real time PCR. Vet Microbiol.  
385 2010;144:437-43.
- 386 11. Yano H, Iwamoto T, Nishiuchi Y, Nakajima C, Starkova DA, Mokrousov I, et al.  
387 Population structure and local adaptation of MAC lung disease agent *Mycobacterium*  
388 *avium* subsp. *hominissuis*. Genome Biol Evol. 2017;9:2403-17.
- 389 12. Yano H, Suzuki H, Maruyama F, Iwamoto T. The recombination-cold region as an  
390 epidemiological marker of recombinogenic opportunistic pathogen *Mycobacterium*  
391 *avium*. BMC Genomics. 2019;20:752.
- 392 13. Dragset MS, Iøerger TR, Loevenich M, Haug M, Sivakumar N, Marstad A, et al. Global  
393 assessment of *Mycobacterium avium* subsp. *hominissuis* genetic requirement for  
394 growth and virulence. mSystems. 2019;4:e00402-19.
- 395 14. Bruffaerts N, Vluggen C, Roupie V, Duytschaever L, Van den Poel C, Denoël J, et al.  
396 Virulence and immunogenicity of genetically defined human and porcine isolates of  
397 *M. avium* subsp. *hominissuis* in an experimental mouse infection. PLoS One.  
398 2017;12:e0171895.
- 399 15. [dx.doi.org/10.17504/protocols.io.bujenuje](https://doi.org/10.17504/protocols.io.bujenuje)
- 400 16. [dx.doi.org/10.17504/protocols.io.bupvvnv6](https://doi.org/10.17504/protocols.io.bupvvnv6)
- 401 17. Chen ZH, Butler WR, Baumstark BR, Ahearn DG. Identification and differentiation of  
402 *Mycobacterium avium* and *M. intracellulare* by PCR. J Clin Microbiol. 1996;34:1267-9.

- 403 18. Kim BJ, Lee SH, Lyu MA, Kim SJ, Bai GH, Chae GT, et al. Identification of mycobacterial  
404 species by comparative sequence analysis of the RNA polymerase gene (*rpoB*). J Clin  
405 Microbiol. 1999;37:1714-20.
- 406 19. Turenne CY, Semret M, Cousins, DV, Collins DM, Behr MA. Sequencing of *hsp65*  
407 distinguishes among subsets of the *Mycobacterium avium* complex. J. Clin. Microbiol.  
408 2006;44:433-40.
- 409 20. Ahrens P, Giese SB., Klausen J, Inglis NF. Two markers, IS901-IS902 and p40,  
410 identified by PCR and by using monoclonal antibodies in *Mycobacterium avium*  
411 strains. J Clin Microbiol.1995;33:1049-53.
- 412 21. Kunze ZM, Wall S, Appelberg R, Silva MT, Portaels F, McFadden JJ. IS901, a new  
413 member of a widespread class of atypical insertion sequences, is associated with  
414 pathogenicity in *Mycobacterium avium*. Mol Microbiol. 1991;5:2265-72.
- 415 22. Sanderson JD, Moss MT, Tizard ML, Hermon-Taylor J. *Mycobacterium*  
416 *paratuberculosis* DNA in Crohn's disease tissue. Gut. 1992;33:890-6.
- 417 23. Siguier P, Perochon J, Lestrade L, Mahillon J. Chandler M. ISfinder: the reference  
418 center for bacterial insertion sequences. Nucleic Acids Res. 2006;34:D32-6.
- 419 24. Nurk S, Bankevich A, Antipov D, Gurevich AA, Korobeynikov A, Lapidus A, et al.  
420 Assembling single-cell genomes and mini-metagenomes from chimeric MDA  
421 products. J Comput Biol. 2013;20:714-37.
- 422 25. Walker BJ, Abeel T, Shea T, Priest M, Abouelliel A, Sakthikumar S, et al. Pilon: an  
423 integrated tool for comprehensive microbial variant detection and genome assembly  
424 improvement. PLoS One. 2014;9:e112963.
- 425 26. Wick RR, Judd LM, Gorrie CL, Holt KE. Unicycler: Resolving bacterial genome  
426 assemblies from short and long sequencing reads. PLoS Comput Biol.  
427 2017;13:e1005595.

- 428 27. Parks DH, Imelfort M, Skennerton C T, Hugenholtz P, Tyson GW. CheckM: assessing  
429 the quality of microbial genomes recovered from isolates, single cells, and  
430 metagenomes. *Genome Res.* 2015;25:1043-55.
- 431 28. Menzel P, Ng KL, Krogh A. Fast and sensitive taxonomic classification for  
432 metagenomics with Kaiju. *Nat Commun.* 2016;7:11257.
- 433 29. Eren AM, Esen ÖC, Quince C, Vineis JH, Morrison HG, Sogin ML, Anvi'o: an advanced  
434 analysis and visualization platform for 'omics data. *PeerJ.* 2015;3:e1319.
- 435 30. Tatusova T, DiCuccio M, Badretdin A, Chetvernin V, Nawrocki EP, Zaslavsky L, et al.  
436 NCBI prokaryotic genome annotation pipeline. *Nucleic Acids. Res.* 2016;44:6614-24.
- 437 31. Roer L, Hendriksen RS, Leekitcharoenphon P, Lukjancenko O, Kaas RS, Hasman H, et  
438 al. Is the Evolution of *Salmonella enterica* subsp. *enterica* Linked to Restriction-  
439 Modification Systems? *mSystems.* 2016;1:e00009-16.
- 440 32. Couvin D, Bernheim A, Toffano-Nioche C, Touchon M, Michalik J, Néron B, et al.  
441 CRISPRCasFinder, an update of CRISRFinder, includes a portable version, enhanced  
442 performance and integrates search for Cas proteins. *Nucleic Acids Res.*  
443 2018;46:W246-51.
- 444 33. Grissa I, Vergnaud G, Pourcel C. CRISPRFinder: a web tool to identify clustered  
445 regularly interspaced short palindromic repeats. *Nucleic Acids Res.* 2007;35:W52-7.
- 446 34. Lowe TM, Chan PP. tRNAscan-SE On-line: integrating search and context for analysis  
447 of transfer RNA genes. *Nucleic Acids Res.* 2016;44:W54-7.
- 448 35. Morgado SM, Vicente ACP. Beyond the Limits: tRNA array units in *Mycobacterium*  
449 genomes. *Front Microbiol.* 2018;9:1042.
- 450 36. Liu B, Zheng D, Jin Q, Chen L, Yang J. VFDB 2019: a comparative pathogenomic  
451 platform with an interactive web interface. *Nucleic Acids Res.* 2019;47:D687-92.

- 452 37. Alcock BP, Raphenya AR, Lau TTY, Tsang KK, Bouchard M, Edalatmand A, et al. CARD  
453 2020: antibiotic resistance surveillance with the comprehensive antibiotic resistance  
454 database. *Nucleic Acids Res.* 2020;48:D517-25.
- 455 38. Ichikawa K, Yagi T, Moriyama M, Inagaki T, Nakagawa T, Uchiya KI, et al.  
456 Characterization of *Mycobacterium avium* clinical isolates in Japan using subspecies-  
457 specific insertion sequences, and identification of a new insertion sequence, IS*Mav6*.  
458 *J Med Microbiol.* 2009;58:945-50.
- 459 39. Mijs W, de Haas P, Rossau R, Van der Laan T, Rigouts L, Portaels F, et al. Molecular  
460 evidence to support a proposal to reserve the designation *Mycobacterium avium*  
461 subsp. *avium* for bird-type isolates and '*M. avium* subsp. *hominissuis*' for the  
462 human/porcine type of *M. avium*. *Int J Syst Evol Microbiol.*2002;52:1505-18.
- 463 40. Hibiya K, Kazumi Y, Nishiuchi Y, Sugawara I, Miyagi K, Oda Y, et al. Descriptive  
464 analysis of the prevalence and the molecular epidemiology of *Mycobacterium avium*  
465 complex-infected pigs that were slaughtered on the main island of Okinawa. *Comp*  
466 *Immunol Microbiol Infect Dis.* 2010;33:401-21.
- 467 41. Matern WM, Bader JS, Karakousis PC. Genome analysis of *Mycobacterium avium*  
468 subspecies *hominissuis* strain 109. *Sci Data.* 2018;5:180277.
- 469 42. Uchiya K, Takahashi H, Yagi T, Moriyama M, Inagaki T, Ichikawa K, et al. Comparative  
470 genome analysis of *Mycobacterium avium* revealed genetic diversity in strains that  
471 cause pulmonary and disseminated disease. *PLoS One.* 2013;8:e71831.
- 472 43. Gorla P, Plocinska R, Sarva K, Satsangi AT, Pandeeti E, Donnelly R, et al. *MtrA*  
473 response regulator controls cell division and cell wall metabolism and affects  
474 susceptibility of *Mycobacteria* to the first line antituberculosis drugs. *Front Microbiol.*  
475 2018;9:2839.

- 476 44. Newell KV, Thomas DP, Brekasis D, Paget MS. The RNA polymerase-binding protein  
477 *RbpA* confers basal levels of rifampicin resistance on *Streptomyces coelicolor*. Mol  
478 Microbiol. 2006;60:687-96.
